# Supplementary material for: Clenching the Strings of Bruxism Etiopathogenesis: Association Analyses on Genetics and Environmental Risk Factors in a Deeply Characterized Italian Cohort
Source: MDPI journal article supplement (doi:10.3390/biomedicines12020304), 2024-01-28
Supplement: s1 [file s1]

**Table S1. All suggestive results of GWAS ( $p$ -value $<10^{-5}$ ).** Chr = chromosome; Position = position of the best SNP in base pair (all data are aligned to the Human genome reference build 37 (GRCh37)); Alleles = other allele/risk allele; Freq = frequency of the risk allele; OR = Odds Ratio; 95% CI = 95% Confidence Interval; N SNPs: Number of SNPs with a  $p$ -value  $< 1 \times 10^{-5}$ .

| <i>Chr</i> | <i>Position</i> | <i>SNP</i>  | <i>Alleles</i> | <i>Freq</i> | <i>OR (95% CI)</i>  | <i>p-value</i> | <i>Consequence</i>        | <i>Gene</i>           | <i>Biotype</i>       |
|------------|-----------------|-------------|----------------|-------------|---------------------|----------------|---------------------------|-----------------------|----------------------|
| 3          | 3500995         | rs201276817 | T/C            | 0.064       | 5.32 (2.62 - 10.78) | 3.6E-06        | intron_variant            | <i>AC026188.1</i>     | lincRNA              |
| 3          | 173468188       | rs1038644   | A/G            | 0.105       | 3.13 (1.90 - 5.14)  | 6.8E-06        | intron_variant            | <i>NLGN1</i>          | protein_coding       |
| 3          | 173472086       | rs4465969   | A/G            | 0.215       | 2.46 (1.69 - 3.56)  | 2.1E-06        | intron_variant            | <i>NLGN1</i>          | protein_coding       |
| 3          | 173472327       | rs2046718   | C/T            | 0.200       | 2.65 (1.83 - 3.84)  | 2.6E-07        | intron_variant            | <i>NLGN1</i>          | protein_coding       |
| 3          | 173473286       | rs1387003   | A/T            | 0.215       | 2.48 (1.71 - 3.59)  | 1.7E-06        | intron_variant            | <i>NLGN1</i>          | protein_coding       |
| 3          | 173473923       | rs147792696 | T/TACACAA      | 0.226       | 2.35 (1.61 - 3.42)  | 8.1E-06        | intron_variant            | <i>NLGN1</i>          | protein_coding       |
| 3          | 173474556       | rs397774661 | T/TA           | 0.216       | 2.53 (1.72 - 3.72)  | 2.2E-06        | intron_variant            | <i>NLGN1</i>          | protein_coding       |
| 3          | 185155430       | rs5855065   | C/CTT          | 0.127       | 2.85 (1.79 - 4.51)  | 9.0E-06        | intron_variant            | <i>MAP3K13</i>        | protein_coding       |
| 3          | 189128814       | rs112271984 | T/C            | 0.065       | 4.38 (2.45 - 7.83)  | 6.0E-07        | intergenic_variant        | -                     | -                    |
| 5          | 154794656       | rs397945106 | A/AT           | 0.214       | 2.77 (1.88 - 4.07)  | 2.3E-07        | intergenic_variant        | -                     | -                    |
| 5          | 154797478       | rs59842935  | A/C            | 0.197       | 2.55 (1.73 - 3.78)  | 2.7E-06        | intergenic_variant        | -                     | -                    |
| 6          | 1405632         | rs9378620   | A/T            | 0.078       | 4.24 (2.29 - 7.87)  | 4.5E-06        | intergenic_variant        | -                     | -                    |
| 6          | 150829462       | rs530877947 | C/CTT          | 0.154       | 3.30 (2.02 - 5.38)  | 1.7E-06        | intron_variant            | <i>RP11-291C6.1</i>   | processed_pseudogene |
| 9          | 129053048       | rs35610872  | G/A            | 0.566       | 1.93 (1.44 - 2.59)  | 9.2E-06        | intergenic_variant        | -                     | -                    |
| 12         | 23752325        | rs79109875  | A/G            | 0.068       | 4.42 (2.37 - 8.24)  | 3.1E-06        | intron_variant            | <i>SOX5</i>           | protein_coding       |
| 12         | 25195936        | rs397790236 | T/TA           | 0.809       | 2.93 (1.88 - 4.57)  | 2.2E-06        | downstream_gene_variant   | <i>LRMP</i>           | processed_transcript |
| 12         | 29032311        | rs767855632 | G/GAAAA        | 0.105       | 3.82 (2.12 - 6.88)  | 7.9E-06        | intergenic_variant        | -                     | -                    |
| 12         | 92071049        | rs10859178  | G/A            | 0.198       | 2.40 (1.64 - 3.53)  | 7.6E-06        | upstream_gene_variant     | <i>RP11-1041F24.1</i> | lincRNA              |
| 12         | 92072728        | rs10859179  | A/G            | 0.199       | 2.40 (1.64 - 3.52)  | 7.6E-06        | upstream_gene_variant     | <i>RP11-1041F24.1</i> | lincRNA              |
| 12         | 92079915        | rs1493762   | T/G            | 0.197       | 2.43 (1.66 - 3.55)  | 5.1E-06        | regulatory_region_variant | -                     | enhancer             |
| 12         | 92080205        | rs1493761   | A/G            | 0.197       | 2.43 (1.66 - 3.56)  | 5.1E-06        | intergenic_variant        | -                     | -                    |
| 12         | 92084642        | rs9634202   | C/T            | 0.197       | 2.43 (1.66 - 3.57)  | 5.0E-06        | intergenic_variant        | -                     | -                    |
| 12         | 92089340        | rs75841027  | AATG/A         | 0.197       | 2.42 (1.65 - 3.55)  | 5.8E-06        | intergenic_variant        | -                     | -                    |
| 12         | 92090271        | rs10859181  | A/G            | 0.197       | 2.41 (1.65 - 3.54)  | 6.0E-06        | intergenic_variant        | -                     | -                    |
| 12         | 92092330        | rs10859182  | G/A            | 0.197       | 2.41 (1.64 - 3.53)  | 6.5E-06        | intergenic_variant        | -                     | -                    |
| 12         | 92099539        | rs369634297 | TAGAAGC/T      | 0.196       | 2.43 (1.66 - 3.57)  | 6.0E-06        | intergenic_variant        | -                     | -                    |

|    |           |                                  |                       |       |                    |         |                               |                   |                       |
|----|-----------|----------------------------------|-----------------------|-------|--------------------|---------|-------------------------------|-------------------|-----------------------|
| 12 | 92102903  | rs11106253                       | T/C                   | 0.166 | 2.78 (1.85 - 4.16) | 7.4E-07 | intergenic_variant            | -                 | -                     |
| 12 | 92108761  | rs116634769                      | T/G                   | 0.197 | 2.41 (1.64 - 3.53) | 6.4E-06 | intergenic_variant            | -                 | -                     |
| 12 | 92109755  | rs11323014                       | CT/C                  | 0.197 | 2.41 (1.64 - 3.53) | 6.4E-06 | intergenic_variant            | -                 | -                     |
| 12 | 92113658  | rs28489833                       | G/A                   | 0.166 | 2.70 (1.75 - 4.17) | 7.6E-06 | intergenic_variant            | -                 | -                     |
| 12 | 105155242 | 12:105155242_TAC<br>ACACAC_TAC   | TACACAC/T             | 0.486 | 2.17 (1.54 - 3.05) | 8.5E-06 | 3_prime_UTR_varian<br>t       | CHST11            | protein_coding        |
| 12 | 131068531 | rs73456741                       | C/T                   | 0.095 | 3.27 (1.99 - 5.35) | 2.6E-06 | intron_variant                | RIMBP2            | protein_coding        |
| 12 | 131069632 | rs57326734                       | G/A                   | 0.096 | 3.26 (1.99 - 5.34) | 2.7E-06 | intron_variant                | RIMBP2            | protein_coding        |
| 12 | 131069730 | rs12315215                       | C/T                   | 0.095 | 3.26 (1.99 - 5.33) | 2.8E-06 | intron_variant                | RIMBP2            | protein_coding        |
| 12 | 131069907 | rs11061011                       | G/A                   | 0.095 | 3.26 (1.99 - 5.34) | 2.8E-06 | intron_variant                | RIMBP2            | protein_coding        |
| 12 | 131072117 | rs369673290                      | C/T                   | 0.096 | 3.25 (1.98 - 5.32) | 2.8E-06 | intron_variant                | RIMBP2            | protein_coding        |
| 12 | 131072229 | rs571497947                      | TGGGGGGA/<br>T        | 0.101 | 3.49 (2.15 - 5.69) | 4.7E-07 | intron_variant                | RIMBP2            | protein_coding        |
| 12 | 131075463 | rs7978710                        | G/A                   | 0.095 | 3.32 (2.02 - 5.45) | 2.1E-06 | intron_variant                | RIMBP2            | protein_coding        |
| 12 | 131080871 | rs7968068                        | T/G                   | 0.109 | 2.93 (1.82 - 4.71) | 9.5E-06 | intron_variant                | RIMBP2            | protein_coding        |
| 12 | 131085414 | rs58481716                       | C/T                   | 0.108 | 2.97 (1.85 - 4.76) | 6.6E-06 | intron_variant                | RIMBP2            | protein_coding        |
| 12 | 131086167 | rs12313276                       | G/A                   | 0.108 | 3.05 (1.90 - 4.90) | 3.8E-06 | intron_variant                | RIMBP2            | protein_coding        |
| 12 | 131087275 | rs7974202                        | G/A                   | 0.108 | 3.00 (1.87 - 4.82) | 5.3E-06 | intron_variant                | RIMBP2            | protein_coding        |
| 12 | 131087471 | rs11061017                       | C/T                   | 0.108 | 3.00 (1.87 - 4.82) | 5.4E-06 | intron_variant                | RIMBP2            | protein_coding        |
| 12 | 131088062 | rs728931                         | G/A                   | 0.108 | 3.00 (1.87 - 4.82) | 5.3E-06 | intron_variant                | RIMBP2            | protein_coding        |
| 12 | 131088248 | rs7972304                        | A/T                   | 0.108 | 3.00 (1.87 - 4.82) | 5.3E-06 | intron_variant                | RIMBP2            | protein_coding        |
| 13 | 40150635  | rs2324342                        | A/C                   | 0.136 | 2.75 (1.77 - 4.29) | 7.5E-06 | intron_variant                | LHFP              | protein_coding        |
| 13 | 40151066  | rs2324343                        | G/T                   | 0.136 | 2.75 (1.77 - 4.28) | 7.5E-06 | intron_variant                | LHFP              | protein_coding        |
| 13 | 40152431  | rs4142372                        | G/A                   | 0.137 | 2.73 (1.75 - 4.24) | 8.8E-06 | intron_variant                | LHFP              | protein_coding        |
| 13 | 40152988  | rs9315709                        | C/A                   | 0.137 | 2.72 (1.75 - 4.24) | 8.9E-06 | intron_variant                | LHFP              | protein_coding        |
| 13 | 40154473  | rs9576869                        | T/C                   | 0.137 | 2.72 (1.75 - 4.23) | 8.4E-06 | intron_variant                | LHFP              | protein_coding        |
| 13 | 40156826  | rs2324345                        | C/T                   | 0.131 | 2.76 (1.77 - 4.31) | 7.9E-06 | intron_variant                | LHFP              | protein_coding        |
| 14 | 103838633 | 14:103838633_G_GC<br>A           | G/GCA                 | 0.715 | 2.64 (1.73 - 4.01) | 5.9E-06 | downstream_gene_v<br>ariant   | RP11-<br>600F24.1 | processed_pseudogene  |
| 14 | 105107537 | rs7143644                        | G/A                   | 0.071 | 4.75 (2.50 - 9.03) | 1.9E-06 | intergenic_variant            | -                 | -                     |
| 16 | 86064942  | rs868325                         | C/T                   | 0.240 | 2.52 (1.74 - 3.64) | 8.3E-07 | regulatory_region_va<br>riant | -                 | open_chromatin_region |
| 17 | 50853054  | 17:50853054_TAAA<br>AAAAAAAAAA_T | TAAAAAAA<br>AAAAAAA/T | 0.093 | 4.29 (2.29 - 8.05) | 5.5E-06 | intergenic_variant            | -                 | -                     |
